# Supplementary material
Source: PubMed Central journal article supplement (PMC8204652)
Supplement: femsle_367_1_fnaa018_s6.pdf [file femsle_367_1_fnaa018_s6.pdf]

Table S1. Strain names and 16S BLAST results of SWI strains.

| Strain name and Genus            | Strain name and Genus               |
|----------------------------------|-------------------------------------|
| F16_33-1 <i>Bacillus</i> spp.    | F17_19-1 <i>Lysinibacillus</i> spp. |
| F16_34-2 <i>Pseudomonas</i> spp. | F17_20-1 <i>Paenibacillus</i> spp.  |
| F16_35-1 <i>Bacillus</i> spp.    | F17_21-1 <i>Bacillus</i> spp.       |
| F16_35-2 <i>Pseudomonas</i> spp. | F17_22-1 <i>Bacillus</i> spp.       |
| F16_36-1 <i>Pseudomonas</i> spp. | F17_22-2 <i>Pseudomonas</i> spp.    |
| F16_36-2 <i>Pseudomonas</i> spp. | F17_23-1 <i>Bacillus</i> spp.       |
| F16_37-2 <i>Pseudomonas</i> spp. | F17_23-2 <i>Pseudomonas</i> spp.    |
| F16_38-1 <i>Bacillus</i> spp.    | F17_24-2 <i>Pseudomonas</i> spp.    |
| F16_38-2 <i>Pseudomonas</i> spp. | F17_28-2 <i>Pseudomonas</i> spp.    |
| F16_39-1 <i>Bacillus</i> spp.    | F17_SWI6 <i>Pseudomonas</i> spp.    |
| F16_39-2 <i>Pseudomonas</i> spp. | S18_1-1 <i>Bacillus</i> spp.        |
| F16_40-1 <i>Bacillus</i> spp.    | S18_1-2 <i>Pseudomonas</i> spp.     |
| F16_40-2 <i>Pseudomonas</i> spp. | S18_3-1 <i>Pseudomonas</i> spp.     |
| F16_41-1 <i>Bacillus</i> spp.    | S18_3-2 <i>Pseudomonas</i> spp.     |
| F16_41-2 <i>Pseudomonas</i> spp. | S18_4-1 <i>Pseudomonas</i> spp.     |
| F16_42-1 <i>Bacillus</i> spp.    | S18_4-2 <i>Pseudomonas</i> spp.     |
| F16_43-1 <i>Bacillus</i> spp.    | S18_6-2 <i>Pseudomonas</i> spp.     |
| F16_43-2 <i>Pseudomonas</i> spp. | S18_8-1 <i>Bacillus</i> spp.        |
| F16_44-1 <i>Bacillus</i> spp.    | S18_8-2 <i>Pseudomonas</i> spp.     |
| F16_45-1 <i>Bacillus</i> spp.    | S18_9-1 <i>Bacillus</i> spp.        |
| F16_46-1 <i>Bacillus</i> spp.    | S18_9-2 <i>Pseudomonas</i> spp.     |

|                                   |                                  |
|-----------------------------------|----------------------------------|
| F16_46-2 <i>Pseudomonas</i> spp.  | S18_10-1 <i>Bacillus</i> spp.    |
| F16_47-1 <i>Bacillus</i> spp.     | S18_10-2 <i>Pseudomonas</i> spp. |
| F16_47-2 <i>Pseudomonas</i> spp.  | S18_11-1 <i>Bacillus</i> spp.    |
| F16_48-1 <i>Pseudomonas</i> spp.  | S18_12-2 <i>Pseudomonas</i> spp. |
| F16_48-2 <i>Pseudomonas</i> spp.  | S18_13-1 <i>Bacillus</i> spp.    |
| F16_50-2 <i>Pseudomonas</i> spp.  | S18_13-2 <i>Pseudomonas</i> spp. |
| F16_51-1 <i>Bacillus</i> spp.     | S18_15-2 <i>Pseudomonas</i> spp. |
| F16_52-1 <i>Bacillus</i> spp.     | S18_16-1 <i>Bacillus</i> spp.    |
| F16_53-1 <i>Bacillus</i> spp.     | S18_16-2 <i>Pseudomonas</i> spp. |
| F16_53-2 <i>Pseudomonas</i> spp.  | S18_17-1 <i>Bacillus</i> spp.    |
| F16_54-1 <i>Bacillus</i> spp.     | S18_17-2 <i>Serratia</i> spp.    |
| F16_54-2 <i>Pseudomonas</i> spp.  | S18_18-1 <i>Pseudomonas</i> spp. |
| F16_55-1 <i>Bacillus</i> spp.     | S18_18-2 <i>Pseudomonas</i> spp. |
| F16_55-2 <i>Serratia</i> spp.     | S18_19-1 <i>Citrobacter</i> spp. |
| F16_56-1 <i>Bacillus</i> spp.     | S18_19-2 <i>Pseudomonas</i> spp. |
| F16_56-2 <i>Pseudomonas</i> spp.  | S18_21-1 <i>Pseudomonas</i> spp. |
| F16_SWI44 <i>Pseudomonas</i> spp. | S18_22-2 <i>Pseudomonas</i> spp. |
| F17_1-1 <i>Bacillus</i> spp.      | S18_24-2 <i>Pseudomonas</i> spp. |
| F17_1-2 <i>Pseudomonas</i> spp.   | S18_25-1 <i>Bacillus</i> spp.    |
| F17_2-1 <i>Bacillus</i> spp.      | S18_25-2 <i>Pseudomonas</i> spp. |
| F17_2-2 <i>Pseudomonas</i> spp.   | S18_33-2 <i>Pseudomonas</i> spp. |
| F17_3-1 <i>Bacillus</i> spp.      | S18_34-1 <i>Pseudomonas</i> spp. |
| F17_3-2 <i>Pseudomonas</i> spp.   | S18_34-2 <i>Pseudomonas</i> spp. |

|                                    |                                  |
|------------------------------------|----------------------------------|
| F17_4-1 <i>Bacillus</i> spp.       | S18_37-2 <i>Pseudomonas</i> spp. |
| F17_4-2 <i>Pseudomonas</i> spp.    | S18_41-2 <i>Pseudomonas</i> spp. |
| F17_5-1 <i>Pseudomonas</i> spp.    | S18_42-1 <i>Bacillus</i> spp.    |
| F17_6-1 <i>Lysinibacillus</i> spp. | S18_42-2 <i>Pseudomonas</i> spp. |
| F17_7-1 <i>Bacillus</i> spp.       | S18_43-2 <i>Pseudomonas</i> spp. |
| F17_7-2 <i>Pseudomonas</i> spp.    | S18_44-1 <i>Bacillus</i> spp.    |
| F17_8-2 <i>Pseudomonas</i> spp.    | S18_44-2 <i>Pseudomonas</i> spp. |
| F17_9-1 <i>Bacillus</i> spp.       | S18_48-2 <i>Pseudomonas</i> spp. |
| F17_9-2 <i>Pseudomonas</i> spp.    | S18_49-2 <i>Pseudomonas</i> spp. |
| F17_10-1 <i>Pseudomonas</i> spp.   | S18_50-1 <i>Pseudomonas</i> spp. |
| F17_10-2 <i>Pseudomonas</i> spp.   | S18_52-2 <i>Pseudomonas</i> spp. |
| F17_11-2 <i>Pseudomonas</i> spp.   | S18_54-2 <i>Pseudomonas</i> spp. |
| F17_12-1 <i>Bacillus</i> spp.      | S18_55-1 <i>Bacillus</i> spp.    |
| F17_12-2 <i>Bacillus</i> spp.      | S18_57-2 <i>Pseudomonas</i> spp. |
| F17_13-1 <i>Bacillus</i> spp.      | S18_BC-2 <i>Pseudomonas</i> spp. |
| F17_14-1 <i>Bacillus</i> spp.      | S18_MD-1 <i>Bacillus</i> spp.    |
| F17_14-2 <i>Pseudomonas</i> spp.   | S18_MD-2 <i>Pseudomonas</i> spp. |
| F17_15-1 <i>Bacillus</i> spp.      | S18_SS-1 <i>Bacillus</i> spp.    |
| F17_15-2 <i>Pseudomonas</i> spp.   | S18_SS-2 <i>Pseudomonas</i> spp. |
| F17_16-2 <i>Pseudomonas</i> spp.   | S18_SWI7 <i>Pseudomonas</i> spp. |
| F17_18-2 <i>Pseudomonas</i> spp.   | SWI36 <i>Pseudomonas</i> spp.    |

Table S2. BGCs identified by JGI IMG in SWI44<sub>WT</sub>.

| BGC | From bp   | To bp     | Length | Predicted Product |
|-----|-----------|-----------|--------|-------------------|
| 1   | 311,568   | 355,175   | 43,608 | arylpolyene       |
| 2   | 564,316   | 606,657   | 42,342 | thiopeptide       |
| 3   | 1,413,052 | 1,428,017 | 14,966 | NAGGN             |
| 4   | 2,132,818 | 2,153,234 | 20,417 | phenazine         |
| 5   | 2,946,528 | 2,987,254 | 40,727 | NRPS-like         |
| 6   | 3,576,460 | 3,587,305 | 10,846 | bacteriocin       |
| 7   | 3,982,122 | 4,073,153 | 91,032 | NRPS              |

Table S3. BGCs identified by JGI IMG in SWI6<sub>WT</sub>

| BGC | From bp   | To bp     | Length | Predicted Product |
|-----|-----------|-----------|--------|-------------------|
| 1   | 2,042,474 | 2,133,503 | 91,030 | NRPS              |
| 2   | 2,524,761 | 2,535,606 | 10,846 | bacteriocin       |
| 3   | 2,873,580 | 2,916,387 | 42,808 | NRPS-like         |
| 4   | 3,627,484 | 3,647,900 | 20,417 | phenazine         |
| 5   | 4,351,262 | 4,366,227 | 14,966 | NAGGN             |
| 6   | 5,149,350 | 5,191,694 | 42,345 | thiopeptide       |
| 7   | 5,403,567 | 5,447,174 | 43,608 | arylpolyene       |

Table S4. BGCs identified by JGI IMG in SWI7<sub>WT</sub>.

| BGC | From bp   | To bp     | Length | Predicted product |
|-----|-----------|-----------|--------|-------------------|
| 1   | 258,018   | 272,845   | 14,827 | NAGGN             |
| 2   | 504,289   | 600,124   | 95,835 | NRPS              |
| 3   | 1,087,797 | 1,111,436 | 23,639 | terpene           |
| 4   | 1,428,494 | 1,508,635 | 80,141 | NRPS              |
| 5   | 4,104,237 | 4,147,845 | 43,608 | arylpolyene       |

Table S5. Transposon insertions in SWI44<sub>LOI</sub> mutants.

| SWI44 mutant | Gene ID    | BGC ID                             | Location of Tn insertion (bp) | Predicted Function                                                       |
|--------------|------------|------------------------------------|-------------------------------|--------------------------------------------------------------------------|
| 1            | 2717929146 | 2716925891.Ga0172617<br>11.region2 | 574,981                       | glutathione-regulated potassium-efflux system ancillary protein KefG     |
| 2            | 2717929148 | 2716925891.Ga0172617<br>11.region2 | 576,124                       | A-factor biosynthesis hotdog domain-containing protein                   |
| 3            | 2717929151 | 2716925891.Ga0172617<br>11.region2 | 579,269                       | NAD(P)-dependent dehydrogenase, short-chain alcohol dehydrogenase family |
| 4            | 2717929836 | -                                  | 1,322,000                     | <i>gacS</i> , two-component system, sensor histidine kinase              |
| 5            | 2717929836 | -                                  | 1,320,750                     | <i>gacS</i> , two-component system, sensor histidine kinase              |

|   |            |   |           |                                                                   |
|---|------------|---|-----------|-------------------------------------------------------------------|
| 6 | 2717929836 | - | 1,321,500 | <i>gacS</i> , two-component<br>system, sensor<br>histidine kinase |
|---|------------|---|-----------|-------------------------------------------------------------------|

---

Table S6. Transposon insertions in SWI6<sub>LOI</sub> mutants.

| SWI6 mutant | Gene ID    | BGC ID                             | Location of Tn insertion (bp) | Predicted Function             |
|-------------|------------|------------------------------------|-------------------------------|--------------------------------|
| 1           | 2771388066 | 2770957150.Ga0255654<br>11.region6 | 5176564                       | NAD(P)-dependent dehydrogenase |
| 2           | 2771387398 | -                                  | 4458161                       | <i>gacS</i> sensor kinase      |

Table S7. Transposon insertions in SWI7<sub>LOI</sub> mutant.

| SWI6 mutant | Gene ID    | DNA cluster coordinates | Location of Tn insertion (bp) | Predicted Function |
|-------------|------------|-------------------------|-------------------------------|--------------------|
| 1           | 2791818508 | -                       | 2541253                       | hypothetical       |



Table S8. Predicted ORFs in SWI44<sub>WT</sub> and SWI6<sub>WT</sub> BGC.

| ORF # | <sup>a</sup> JGI locus tag | AA length | Predicted function                                        |
|-------|----------------------------|-----------|-----------------------------------------------------------|
| 1     | 11499                      | 86        | tRNA dimethylallyl-transferase                            |
| 2     | 11501                      | 433       | GTP-binding protein<br>HflX                               |
| 3     | 11502                      | 390       | Protease FtsH subunit<br>HflK                             |
| 4     | 11503                      | 289       | Protease FtsH subunit<br>HflC                             |
| 5     | 11504                      | 395       | ATP phosphor-<br>ribosyltransferase<br>regulatory subunit |
| 6     | 11505                      | 430       | Adenylosuccinate<br>synthetase                            |
| 7     | 11506                      | 644       | Methyl-accepting<br>chemotaxis protein                    |
| 8     | 11507                      | 237       | LuxR family<br>transcriptional regulator                  |
| 9     | 11508                      | 206       | N-acyl-L-homoserine<br>lactone synthetase                 |

|    |       |     |                                                               |
|----|-------|-----|---------------------------------------------------------------|
| 10 | 11509 | 198 | Potassium-efflux system<br>ancillary protein KefG             |
| 11 | 11510 | 173 | Protein of unknown<br>function                                |
| 12 | 11511 | 403 | A-factor biosynthesis<br>hotdog domain-<br>containing protein |
| 13 | 11512 | 379 | 2,4-dienoyl-CoA<br>reductase                                  |
| 14 | 11513 | 257 | NAD(P)-dependent<br>dehydrogenase                             |
| 15 | 11514 | 245 | NAD(P)-dependent<br>dehydrogenase                             |
| 16 | -     | 143 | Hypothetical protein                                          |
| 17 | 11516 | 521 | iron(III) transport system<br>permease protein                |
| 18 | 11517 | 337 | iron(III) transport system<br>substrate-binding protein       |
| 19 | -     | 84  | tRNA                                                          |
| 20 | -     | 84  | tRNA                                                          |
| 21 | 11520 | 858 | RNAse R                                                       |
| 22 | 11521 | 248 | 23S rRNA<br>methyltransferase                                 |

|    |       |     |                                      |
|----|-------|-----|--------------------------------------|
| 23 | 11522 | 141 | SSU ribosomal protein                |
| 24 | 11523 | 76  | SSU ribosomal protein                |
| 25 | 11524 | 287 | hypothetical                         |
| 26 | 11525 | 148 | LSU ribosomal protein                |
| 27 | 11526 | 465 | DNA helicase                         |
| 28 | 11527 | 541 | ATP-binding cassette                 |
| 29 | 11528 | 384 | ribosomal protein                    |
| 30 | 11529 | 42  | hypothetical                         |
| 31 | 11530 | 765 | SAM protein                          |
| 32 | 11531 | 195 | hypothetical                         |
| 33 | 11532 | 29  | hypothetical                         |
| 34 | 11533 | 149 | azurin                               |
| 35 | 11534 | 275 | NH(3)-dependent<br>NAD(+) synthetase |
| 36 | 11535 | 401 | phosphoribosyltransferase            |
| 37 | 11536 | 378 | amino acid ABC<br>transporter        |
| 38 | 11537 | 304 | amino acid ABC<br>transporter        |
| 39 | 11538 | 432 | amino acid ABC<br>transporter        |

38 11539 291 amino acid ABC  
transporter

41 115430 238 amino acid ABC  
transporter

---

Table S9. Gene regions in SWI6 genome that are absent in SWI44.

| Region | Chromosome        | Gene |             |                                                             |                  |
|--------|-------------------|------|-------------|-------------------------------------------------------------|------------------|
|        | coordinates       | No.  | Locus Tag   | Predicted function                                          | Gene coordinates |
| 1      | 129346-<br>198529 | 1    | C4Q28_00630 | hypothetical protein                                        | 130471-130920    |
|        |                   | 2    | C4Q28_00635 | hypothetical protein                                        | 130933-132400    |
|        |                   | 3    | C4Q28_00640 | hypothetical protein                                        | 132590-133117    |
|        |                   | 4    | C4Q28_00645 | hypothetical protein                                        | 133219-133542    |
|        |                   | 5    | C4Q28_00650 | DNA-binding<br>response regulator                           | 133660-134334    |
|        |                   | 6    | C4Q28_00655 | outer membrane<br>porin, OprD family                        | 134823-136166    |
|        |                   | 7    | C4Q28_00660 | TolC family protein                                         | 136657-137841    |
|        |                   | 8    | C4Q28_00665 | efflux RND<br>transporter<br>periplasmic adaptor<br>subunit | 137910-139160    |
|        |                   | 9    | C4Q28_00670 | CusA/CzcA family<br>heavy metal efflux<br>RND transporter   | 139185-142346    |
|        |                   | 10   | C4Q28_00675 | DUF2790 domain-<br>containing protein                       | 142509-142832    |

|    |             |                                                          |               |
|----|-------------|----------------------------------------------------------|---------------|
| 11 | C4Q28_00680 | heavy metal<br>translocating P-type<br>ATPase            | 143035-145032 |
| 12 | C4Q28_00685 | hypothetical protein                                     | 145125-145349 |
| 13 | C4Q28_00690 | hypothetical protein                                     | 145477-146502 |
| 14 | C4Q28_00695 | porin                                                    | 146801-148108 |
| 15 | C4Q28_00700 | LysR family<br>transcriptional<br>regulator              | 148319-149287 |
| 16 | C4Q28_00705 | GtrA family protein                                      | 149545-149964 |
| 17 | C4Q28_00710 | glycosyltransferase                                      | 149930-150913 |
| 18 | C4Q28_00715 | phospholipid<br>carrier-dependent<br>glycosyltransferase | 150907-152361 |
| 19 | C4Q28_00720 | hypothetical protein                                     | 152444-152665 |
| 20 | C4Q28_00725 | hypothetical protein                                     | 152932-153519 |
| 21 | C4Q28_00730 | two-component<br>sensor histidine<br>kinase              | 153577-154995 |
| 22 | C4Q28_00735 | DNA-binding<br>response regulator                        | 154992-155666 |
| 23 | C4Q28_00740 | DUF2790 domain-<br>containing protein                    | 156356-156682 |

|    |             |                                           |               |
|----|-------------|-------------------------------------------|---------------|
| 24 | C4Q28_00745 | hypothetical protein                      | 156715-157065 |
| 25 | C4Q28_00750 | cation transporter                        | 157223-158128 |
| 26 | C4Q28_00755 | zinc ribbon domain-<br>containing protein | 158183-158521 |
| 27 | C4Q28_00760 | phosphoethanolami<br>ne transferase       | 159012-160709 |
| 28 | C4Q28_00765 | hypothetical protein                      | 161104-161310 |
| 29 | C4Q28_00770 | hypothetical protein                      | 161325-161534 |
| 30 | C4Q28_00775 | hypothetical protein                      | 161755-161952 |
| 31 | C4Q28_00780 | IS3 family<br>transposase                 | 162011-163161 |
| 32 | C4Q28_00785 | transposase                               | 163178-163423 |
| 33 | C4Q28_00790 | hypothetical protein                      | 163446-163754 |
| 34 | C4Q28_00795 | hypothetical protein                      | 163812-164108 |
| 35 | C4Q28_00800 | hypothetical protein                      | 164167-164823 |
| 36 | C4Q28_00805 | NAD-dependent<br>deacylase                | 165030-165818 |
| 37 | C4Q28_00810 | DUF4325 domain-<br>containing protein     | 166136-166441 |
| 38 | C4Q28_00815 | ATP-binding<br>protein                    | 166565-167185 |
| 39 | C4Q28_00820 | transcriptional<br>regulator              | 168116-168322 |

|    |             |                                                                      |               |
|----|-------------|----------------------------------------------------------------------|---------------|
| 40 | C4Q28_00825 | copper-translocating<br>P-type ATPase                                | 168734-171121 |
| 41 | C4Q28_00830 | cation transporter                                                   | 171459-171659 |
| 42 | C4Q28_00835 | hypothetical protein                                                 | 171925-172947 |
| 43 | C4Q28_00840 | hypothetical protein                                                 | 173086-173541 |
| 44 | C4Q28_00845 | DUF2933 domain-<br>containing protein                                | 173567-173842 |
| 45 | C4Q28_00850 | isoprenylcysteine<br>carboxylmethyltrans<br>ferase family<br>protein | 173839-174498 |
| 46 | C4Q28_00855 | IS5/IS1182 family<br>transposase                                     | 174618-175598 |
| 47 | C4Q28_00860 | polyamine ABC<br>transporter<br>substrate-binding<br>protein         | 175734-175877 |
| 48 | C4Q28_00865 | heat-shock protein<br>HtpX                                           | 176109-176456 |
| 49 | C4Q28_00870 | CusA/CzcA family<br>heavy metal efflux<br>RND transporter            | 176453-179611 |



|    |             |                                                             |               |
|----|-------------|-------------------------------------------------------------|---------------|
| 50 | C4Q28_00875 | efflux RND<br>transporter<br>periplasmic adaptor<br>subunit | 179608-181074 |
| 51 | C4Q28_00880 | ToIC family protein                                         | 181071-182324 |
| 52 | C4Q28_00885 | hypothetical protein                                        | 182411-182758 |
| 53 | C4Q28_00890 | HAMP domain-<br>containing protein                          | 182795-184201 |
| 54 | C4Q28_00895 | DNA-binding<br>response regulator                           | 184201-184878 |
| 55 | C4Q28_00900 | hypothetical protein                                        | 185045-185251 |
| 56 | C4Q28_00905 | copper resistance<br>system multicopper<br>oxidase          | 185434-187392 |
| 57 | C4Q28_00910 | hypothetical protein                                        | 187389-187730 |
| 58 | C4Q28_00915 | copper resistance<br>protein B                              | 187720-188835 |
| 59 | C4Q28_00920 | cytochrome c                                                | 188845-189624 |
| 60 | C4Q28_00925 | DUF411 domain-<br>containing protein                        | 189614-190069 |
| 61 | C4Q28_00930 | DUF2790 domain-<br>containing protein                       | 190167-190499 |

|   |                   |    |             |                                                       |               |
|---|-------------------|----|-------------|-------------------------------------------------------|---------------|
|   |                   | 62 | C4Q28_00935 | transcriptional<br>regulator                          | 190871-191230 |
|   |                   | 63 | C4Q28_00940 | hypothetical protein                                  | 191287-193203 |
|   |                   | 64 | C4Q28_00945 | AAA family<br>ATPase                                  | 193279-194238 |
|   |                   | 65 | C4Q28_00950 | integrase                                             | 194235-196193 |
|   |                   | 66 | C4Q28_00955 | transposase                                           | 196174-196812 |
|   |                   | 67 | C4Q28_00960 | IS30 family<br>transposase                            | 197442-198470 |
| 2 | 652042-<br>705805 | 68 | C4Q28_03055 | DNA methylase                                         | 652338-654035 |
|   |                   | 69 | C4Q28_03060 | hypothetical protein                                  | 654762-655859 |
|   |                   | 70 | C4Q28_03065 | histidine kinase                                      | 655849-658236 |
|   |                   | 71 | C4Q28_03070 | plasmid<br>mobilization<br>relaxosome protein<br>MobC | 658969-659484 |
|   |                   | 72 | C4Q28_03075 | type IV secretion<br>system protein<br>VirB5          | 659903-660667 |
|   |                   | 73 | C4Q28_03080 | hypothetical protein                                  | 660669-661160 |
|   |                   | 74 | C4Q28_03085 | hypothetical protein                                  | 661157-661411 |

|    |             |                                              |               |
|----|-------------|----------------------------------------------|---------------|
| 75 | C4Q28_03090 | type IV secretion<br>system protein<br>VirB6 | 661414-662493 |
| 76 | C4Q28_03095 | hypothetical protein                         | 662780-662989 |
| 77 | C4Q28_03100 | DUF4917 domain-<br>containing protein        | 663172-664179 |
| 78 | C4Q28_03105 | hypothetical protein                         | 664870-665766 |
| 79 | C4Q28_03110 | hypothetical protein                         | 666173-666397 |
| 80 | C4Q28_03115 | Site-specific<br>recombinase                 | 666612-667673 |
| 81 | C4Q28_03120 | hypothetical protein                         | 668199-669800 |
| 82 | C4Q28_03125 | hypothetical protein                         | 669838-670809 |
| 83 | C4Q28_03130 | hypothetical protein                         | 670782-671486 |
| 84 | C4Q28_03135 | DNA-binding<br>protein                       | 671483-672031 |
| 85 | C4Q28_03140 | hypothetical protein                         | 672028-672951 |
| 86 | C4Q28_03145 | hypothetical protein                         | 672948-673655 |
| 87 | C4Q28_03150 | hypothetical protein                         | 673663-674709 |
| 88 | C4Q28_03155 | phage tail protein                           | 674893-676059 |
| 89 | C4Q28_03160 | phage tail protein                           | 676068-676592 |
| 90 | C4Q28_03165 | Phage protein gp47                           | 676589-677761 |
| 91 | C4Q28_03170 | DUF2590 domain-<br>containing protein        | 677758-678075 |

|     |             |                                          |               |
|-----|-------------|------------------------------------------|---------------|
| 92  | C4Q28_03175 | phage tail tape<br>measure protein       | 678075-680438 |
| 93  | C4Q28_03180 | Tail assembly<br>chaperone               | 680613-680900 |
| 94  | C4Q28_03185 | lysis protein                            | 680897-681394 |
| 95  | C4Q28_03190 | lysozyme                                 | 681391-681921 |
| 96  | C4Q28_03195 | hypothetical protein                     | 681918-682124 |
| 97  | C4Q28_03200 | conjugal transfer<br>protein TraR        | 682121-682339 |
| 98  | C4Q28_03205 | DUF2597 domain-<br>containing protein    | 682339-682788 |
| 99  | C4Q28_03210 | DUF2586 domain-<br>containing protein    | 682795-683910 |
| 100 | C4Q28_03215 | virion<br>morphogenesis<br>protein       | 683922-684602 |
| 101 | C4Q28_03220 | phage tail<br>completion protein         | 684592-685047 |
| 102 | C4Q28_03225 | head completion<br>protein               | 685044-685505 |
| 103 | C4Q28_03230 | terminase                                | 685604-686329 |
| 104 | C4Q28_03235 | phage major capsid<br>protein, P2 family | 686326-687345 |

|     |             |                                                              |               |
|-----|-------------|--------------------------------------------------------------|---------------|
| 105 | C4Q28_03240 | capsid scaffolding<br>protein                                | 687345-688307 |
| 106 | C4Q28_03245 | terminase                                                    | 688468-690456 |
| 107 | C4Q28_03250 | phage portal protein                                         | 690350-691282 |
| 108 | C4Q28_03255 | transcriptional<br>regulator                                 | 691355-691609 |
| 109 | C4Q28_03260 | hypothetical protein                                         | 692061-692294 |
| 110 | C4Q28_03265 | DNA-binding<br>protein                                       | 692291-692548 |
| 111 | C4Q28_03270 | hypothetical protein                                         | 692559-692798 |
| 112 | C4Q28_03275 | hypothetical protein                                         | 692865-693131 |
| 113 | C4Q28_03280 | hypothetical protein                                         | 693564-696257 |
| 114 | C4Q28_03285 | hypothetical protein                                         | 696267-696482 |
| 115 | C4Q28_03290 | XRE family<br>transcriptional<br>regulator                   | 696577-696813 |
| 116 | C4Q28_03295 | integrase                                                    | 696817-697887 |
| 117 | C4Q28_03300 | tRNA-Met                                                     | 697949-698025 |
| 118 | C4Q28_03305 | bifunctional<br>diguanylate<br>cyclase/phosphodies<br>terase | 698042-701785 |

|   |                     |     |             |                                            |                 |
|---|---------------------|-----|-------------|--------------------------------------------|-----------------|
|   |                     | 119 | C4Q28_03310 | RNA polymerase<br>RpoD-like protein        | 701905-703755   |
|   |                     | 120 | C4Q28_03315 | DNA primase                                | 703823-705805   |
| 3 | 1007790-<br>1023145 | 121 | C4Q28_04825 | hypothetical protein                       | 1007746-1007975 |
|   |                     | 122 | C4Q28_04830 | hypothetical protein                       | 1008255-1009274 |
|   |                     | 121 | C4Q28_04835 | hypothetical protein                       | 1009267-1010316 |
|   |                     | 122 | C4Q28_04840 | IS30 family<br>transposase                 | 1010358-1011374 |
|   |                     | 123 | C4Q28_04845 | hypothetical protein                       | 1011322-1012074 |
|   |                     | 124 | C4Q28_04850 | hypothetical protein                       | 1013953-1014278 |
|   |                     | 125 | C4Q28_04855 | XRE family<br>transcriptional<br>regulator | 1014242-1014634 |
|   |                     | 126 | C4Q28_04860 | DDE transposase                            | 1014730-1015565 |
|   |                     | 127 | C4Q28_04865 | hypothetical protein                       | 1015876-1016730 |
|   |                     | 128 | C4Q28_04870 | hypothetical protein                       | 1016814-1017434 |
|   |                     | 129 | C4Q28_04875 | hypothetical protein                       | 1017608-1018096 |
|   |                     | 130 | C4Q28_04880 | preprotein<br>translocase subunit<br>SecA  | 1018481-1020814 |
|   |                     | 131 | C4Q28_04885 | hypothetical protein                       | 1021612-1022463 |

|   |                     |     |             |                                                                    |                 |
|---|---------------------|-----|-------------|--------------------------------------------------------------------|-----------------|
| 4 | 1272390-<br>1308485 | 132 | C4Q28_05995 | glycine/betaine<br>ABC transporter<br>substrate-binding<br>protein | 1272305-1273216 |
|   |                     | 133 | C4Q28_06000 | ABC transporter<br>permease                                        | 1273230-1273943 |
|   |                     | 134 | C4Q28_06005 | hypothetical protein                                               | 1274322-1274900 |
|   |                     | 135 | C4Q28_06010 | integrase                                                          | 1275253-1276497 |
|   |                     | 136 | C4Q28_06015 | addiction module<br>toxin RelE                                     | 1276558-1276926 |
|   |                     | 137 | C4Q28_06020 | transcriptional<br>regulator                                       | 1276919-1277248 |
|   |                     | 138 | C4Q28_06025 | hypothetical protein                                               | 1277329-1277580 |
|   |                     | 139 | C4Q28_06030 | hypothetical protein                                               | 1277797-1278036 |
|   |                     | 140 | C4Q28_06035 | hypothetical protein                                               | 1278073-1278345 |
|   |                     | 141 | C4Q28_06040 | site-specific<br>integrase                                         | 1278363-1279538 |
|   |                     | 142 | C4Q28_06045 | hypothetical protein                                               | 1279867-1280466 |
|   |                     | 143 | C4Q28_06050 | DNA-binding<br>protein                                             | 1280994-1281176 |
|   |                     | 144 | C4Q28_06055 | helicase                                                           | 1281194-1284403 |
|   |                     | 145 | C4Q28_06060 | DUF4391 domain-<br>containing protein                              | 1284418-1285197 |

|     |             |                                          |                 |
|-----|-------------|------------------------------------------|-----------------|
| 146 | C4Q28_06065 | site-specific DNA-<br>methyltransferase  | 1285212-1287059 |
| 147 | C4Q28_06070 | restriction<br>endonuclease<br>subunit R | 1287072-1290086 |
| 148 | C4Q28_06075 | SIR2 family protein                      | 1290202-1291215 |
| 149 | C4Q28_06080 | ATPase                                   | 1291225-1292955 |
| 150 | C4Q28_06085 | transcriptional<br>regulator             | 1293092-1293454 |
| 151 | C4Q28_06090 | hypothetical protein                     | 1293477-1293656 |
| 152 | C4Q28_06095 | anti-restriction<br>protein ArdA         | 1294238-1294750 |
| 153 | C4Q28_06100 | hypothetical protein                     | 1295123-1295905 |
| 154 | C4Q28_06105 | hypothetical protein                     | 1296012-1297910 |
| 155 | C4Q28_06110 | hypothetical protein                     | 1298268-1298717 |
| 156 | C4Q28_06115 | hypothetical protein                     | 1298801-1299130 |
| 157 | C4Q28_06120 | hypothetical protein                     | 1299245-1299574 |
| 158 | C4Q28_06125 | hypothetical protein                     | 1299647-1300333 |
| 159 | C4Q28_06130 | hypothetical protein                     | 1300432-1301304 |
| 160 | C4Q28_06135 | hypothetical protein                     | 1301486-1301743 |
| 161 | C4Q28_06140 | TRAG family<br>protein                   | 1301754-1303178 |
| 162 | C4Q28_06145 | hypothetical protein                     | 1303604-1303813 |



|   |                     |     |             |                                                       |                 |
|---|---------------------|-----|-------------|-------------------------------------------------------|-----------------|
|   |                     | 163 | C4Q28_06150 | hypothetical protein                                  | 1304542-1304829 |
|   |                     | 164 | C4Q28_06155 | relaxase                                              | 1304826-1306415 |
|   |                     | 165 | C4Q28_06160 | hypothetical protein                                  | 1306489-1306995 |
|   |                     | 166 | C4Q28_06165 | hypothetical protein                                  | 1307026-1307511 |
|   |                     | 167 | C4Q28_06170 | hypothetical protein                                  | 1307540-1308370 |
| 5 | 2538588-<br>2547684 | 168 | C4Q28_12015 | four-helix bundle<br>copper-binding<br>protein        | 2538592-2539044 |
|   |                     | 169 | C4Q28_12020 | TonB-dependent<br>receptor                            | 2539153-2541213 |
|   |                     | 170 | C4Q28_12025 | hypothetical protein                                  | 2541292-2541696 |
|   |                     | 171 | C4Q28_12030 | DUF2946 domain-<br>containing protein                 | 2541828-2542148 |
|   |                     | 172 | C4Q28_12035 | nickel import ATP-<br>binding protein<br>NikE         | 2542263-2543078 |
|   |                     | 173 | C4Q28_12040 | nickel import ATP-<br>binding protein<br>NikD         | 2543075-2543845 |
|   |                     | 174 | C4Q28_12045 | nickel ABC<br>transporter<br>permease subunit<br>NikC | 2543846-2544691 |

|   |                     |     |             |                                                                                     |                 |
|---|---------------------|-----|-------------|-------------------------------------------------------------------------------------|-----------------|
|   |                     | 175 | C4Q28_12050 | nickel ABC<br>transporter<br>permease subunit<br>NikB                               | 2544688-2545629 |
|   |                     | 176 | C4Q28_12055 | nickel ABC<br>transporter,<br>nickel/metallophore<br>periplasmic binding<br>protein | 2545631-2547205 |
|   |                     | 179 | C4Q28_12060 | nickel-responsive<br>transcriptional<br>regulator NikR                              | 2547293-2547718 |
| 6 | 3654735-<br>3678798 | 180 | C4Q28_17100 | LysR family<br>transcriptional<br>regulator                                         | 3654863-3655738 |
|   |                     | 181 | C4Q28_17105 | MFS transporter                                                                     | 3656143-3657441 |
|   |                     | 182 | C4Q28_17110 | aminotransferase                                                                    | 3657423-3658103 |
|   |                     | 183 | C4Q28_17115 | outer membrane<br>porin, OprD family                                                | 3658246-3659598 |
|   |                     | 184 | C4Q28_17120 | hypothetical protein                                                                | 3659699-3659974 |
|   |                     | 185 | C4Q28_17125 | hypothetical protein                                                                | 3661611-3662066 |

|     |             |                                                  |                 |
|-----|-------------|--------------------------------------------------|-----------------|
| 186 | C4Q28_17130 | aldehyde<br>dehydrogenase<br>PuuC                | 3662077-3663591 |
| 187 | C4Q28_17135 | amino acid<br>permease                           | 3663661-3665112 |
| 188 | C4Q28_17140 | glutamine<br>amidotransferase                    | 3665182-3666048 |
| 189 | C4Q28_17145 | ferredoxin                                       | 3666067-3666261 |
| 190 | C4Q28_17150 | cytochrome P450                                  | 3666275-3667435 |
| 191 | C4Q28_17155 | glutamine<br>synthetase                          | 3667498-3668877 |
| 192 | C4Q28_17160 | 4Fe-4S dicluster<br>domain-containing<br>protein | 3668940-3669260 |
| 193 | C4Q28_17165 | ferredoxin--<br>NADP(+) reductase                | 3669261-3670244 |
| 194 | C4Q28_17170 | KR domain-<br>containing protein                 | 3670604-3671356 |
| 195 | C4Q28_17175 | helix-turn-helix<br>domain-containing<br>protein | 3671685-3672230 |
| 196 | C4Q28_17180 | hypothetical protein                             | 3672315-3673091 |

|   |                     |     |             |                                                             |                 |
|---|---------------------|-----|-------------|-------------------------------------------------------------|-----------------|
|   |                     | 197 | C4Q28_17185 | succinate-<br>semialdehyde<br>dehydrogenase                 | 3673088-3674470 |
|   |                     | 198 | C4Q28_17190 | glutamine<br>amidotransferase                               | 3674565-3675467 |
|   |                     | 199 | C4Q28_17195 | IS66 family<br>insertion sequence<br>hypothetical protein   | 3675812-3676132 |
|   |                     | 200 | C4Q28_17200 | IS66 family<br>insertion sequence<br>hypothetical protein   | 3676129-3676461 |
|   |                     | 201 | C4Q28_17205 | IS66 family<br>transposase                                  | 3676519-3677979 |
|   |                     | 202 | C4Q28_17210 | porin                                                       | 3678275-3679603 |
| 7 | 3682759-<br>3697545 | 203 | C4Q28_17220 | GMC family<br>oxidoreductase                                | 3681040-3682806 |
|   |                     | 204 | C4Q28_17225 | dehydrogenase                                               | 3682824-3683546 |
|   |                     | 205 | C4Q28_17230 | LacI family DNA-<br>binding<br>transcriptional<br>regulator | 3683788-3684816 |
|   |                     | 206 | C4Q28_17235 | hypothetical protein                                        | 3684919-3685251 |

|     |             |                                                             |                 |
|-----|-------------|-------------------------------------------------------------|-----------------|
| 207 | C4Q28_17240 | IclR family<br>transcriptional<br>regulator                 | 3685361-3686134 |
| 208 | C4Q28_17245 | DUF1656 domain-<br>containing protein                       | 3686230-3686439 |
| 209 | C4Q28_17250 | efflux RND<br>transporter<br>periplasmic adaptor<br>subunit | 3686436-3687317 |
| 210 | C4Q28_17255 | hypothetical protein                                        | 3687314-3689086 |
| 211 | C4Q28_17260 | AraC family<br>transcriptional<br>regulator                 | 3689098-3690153 |
| 212 | C4Q28_17265 | amino acid<br>permease                                      | 3690446-3691873 |
| 213 | C4Q28_17270 | phytanoyl-CoA<br>dioxygenase                                | 3691910-3692791 |
| 214 | C4Q28_17275 | polyketide cyclase                                          | 3692839-3693231 |
| 215 | C4Q28_17280 | nitrilotriacetate<br>monooxygenase                          | 3693301-3693837 |
| 216 | C4Q28_17285 | LacI family DNA-<br>binding                                 | 3693959-3694156 |

|   |                     |     |                                                                         |                 |
|---|---------------------|-----|-------------------------------------------------------------------------|-----------------|
|   |                     |     | transcriptional<br>regulator                                            |                 |
|   |                     | 217 | C4Q28_17290 DoxX family<br>membrane protein                             | 3694258-3695160 |
|   |                     | 218 | C4Q28_17295 hypothetical protein                                        | 3695173-3695685 |
|   |                     | 219 | C4Q28_17300 hypothetical protein                                        | 3695750-3696223 |
|   |                     | 220 | C4Q28_17305 glyoxalase                                                  | 3696364-3697551 |
| 8 | 3704939-<br>3718588 | 221 | C4Q28_17335 alcohol<br>dehydrogenase                                    | 3704186-3705493 |
|   |                     | 222 | C4Q28_17340 outer membrane<br>porin, OprD family                        | 3705582-3706826 |
|   |                     | 223 | C4Q28_17345 galactonate<br>dehydratase                                  | 3706980-3708512 |
|   |                     | 224 | C4Q28_17350 enolase                                                     | 3708578-3709765 |
|   |                     | 225 | C4Q28_17355 MFS transporter                                             | 3709782-3711167 |
|   |                     | 226 | C4Q28_17360 LacI family DNA-<br>binding<br>transcriptional<br>regulator | 3711449-3712486 |
|   |                     | 227 | C4Q28_17365 steryl acetyl<br>hydrolase                                  | 3712499-3713401 |
|   |                     | 228 | C4Q28_17370 outer membrane<br>porin, OprD family                        | 3713444-3714724 |

|     |             |                                                                        |                 |
|-----|-------------|------------------------------------------------------------------------|-----------------|
| 229 | C4Q28_17375 | hypothetical protein                                                   | 3714764-3715633 |
| 230 | C4Q28_17380 | mandelate<br>racemase/muconate<br>lactonizing enzyme<br>family protein | 3715715-3716803 |
| 231 | C4Q28_17385 | NAD(P)-dependent<br>oxidoreductase                                     | 3716800-3717609 |
| 232 | C4Q28_17390 | MFS transporter                                                        | 3717644-3718933 |
| 233 | C4Q28_17415 | IclR family<br>transcriptional<br>regulator                            | 3722280-3723845 |
| 234 | C4Q28_17420 | hypothetical protein                                                   | 3723910-3724182 |
| 235 | C4Q28_17425 | cation/acetate<br>symporter ActP                                       | 3724643-3726208 |
| 236 | C4Q28_17430 | hypothetical protein                                                   | 3726198-3726488 |
| 237 | C4Q28_17435 | aliphatic nitrilase                                                    | 3726569-3727639 |
| 238 | C4Q28_17440 | LysR family<br>transcriptional<br>regulator                            | 3727958-3728869 |
| 239 | C4Q28_17445 | CoA transferase                                                        | 3729137-3730324 |
| 240 | C4Q28_17450 | methylmalonyl-CoA<br>decarboxylase                                     | 3730360-3731160 |

|    |                     |     |             |                                                          |                 |
|----|---------------------|-----|-------------|----------------------------------------------------------|-----------------|
|    |                     | 241 | C4Q28_17455 | succinate-<br>semialdehyde<br>dehydrogenase<br>(NADP(+)) | 3731485-3731674 |
|    |                     | 242 | C4Q28_17460 | hypothetical protein                                     | 3731976-3732713 |
|    |                     | 243 | C4Q28_17465 | AlpA family phage<br>regulatory protein                  | 3732827-3733042 |
| 9  | 3750938-<br>3753781 | 244 | C4Q28_17575 | DUF3800 domain-<br>containing protein                    | 3751029-3752150 |
|    |                     | 245 | C4Q28_17580 | hypothetical protein                                     | 3752219-3753055 |
|    |                     | 246 | C4Q28_17585 | molecular<br>chaperone Tir                               | 3753126-3753635 |
| 10 | 3771417-<br>3777674 | 247 | C4Q28_17690 | hypothetical protein                                     | 3771779-3772855 |
|    |                     | 248 | C4Q28_17695 | hypothetical protein                                     | 3772855-3773820 |
|    |                     | 249 | C4Q28_17700 | hypothetical protein                                     | 3774150-3775226 |
|    |                     | 250 | C4Q28_17705 | IS3 family<br>transposase                                | 3775313-3776463 |
|    |                     | 251 | C4Q28_17710 | tRNA-Pro                                                 | 3777731-3777807 |
| 11 | 3976780-<br>3980761 | 252 | C4Q28_18645 | carbon-nitrogen<br>hydrolase family<br>protein           | 3976866-3977627 |
|    |                     | 253 | C4Q28_18650 | MFS transporter                                          | 3977678-3979051 |



|    |                     |     |             |                                                    |                 |
|----|---------------------|-----|-------------|----------------------------------------------------|-----------------|
|    |                     | 254 | C4Q28_18655 | hypothetical protein                               | 3979078-3979569 |
|    |                     | 255 | C4Q28_18660 | LysR family<br>transcriptional<br>regulator        | 3979750-3980685 |
| 12 | 4298450-<br>4322513 | 256 | C4Q28_20150 | dTDP-4-<br>dehydrorhamnose<br>reductase            | 4298338-4299243 |
|    |                     | 257 | C4Q28_20155 | dTDP-glucose 4,6-<br>dehydratase                   | 4299240-4300340 |
|    |                     | 258 | C4Q28_20160 | hypothetical protein                               | 4300493-4302496 |
|    |                     | 259 | C4Q28_20165 | aminotransferase                                   | 4302589-4303767 |
|    |                     | 260 | C4Q28_20170 | acetyltransferase                                  | 4303864-4304487 |
|    |                     | 261 | C4Q28_20175 | sugar transferase                                  | 4304484-4305080 |
|    |                     | 262 | C4Q28_20180 | glycosyltransferase<br>family 1 protein            | 4305122-4306246 |
|    |                     | 263 | C4Q28_20185 | glycosyl transferase                               | 4306357-4307492 |
|    |                     | 264 | C4Q28_20190 | asparagine synthase<br>(glutamine-<br>hydrolyzing) | 4307486-4309366 |
|    |                     | 265 | C4Q28_20195 | hypothetical protein                               | 4309390-4310616 |
|    |                     | 266 | C4Q28_20200 | serine<br>acetyltransferase                        | 4310649-4311173 |

|     |             |                                                                                                       |                 |
|-----|-------------|-------------------------------------------------------------------------------------------------------|-----------------|
| 267 | C4Q28_20205 | glycosyl transferase<br>family 2                                                                      | 4311170-4312078 |
| 268 | C4Q28_20210 | polysaccharide<br>biosynthesis protein                                                                | 4312080-4313615 |
| 269 | C4Q28_20215 | UDP-4-amino-4, 6-<br>dideoxy-N-acetyl-<br>beta-L-altrosamine<br>N-acetyltransferase                   | 4313581-4314120 |
| 270 | C4Q28_20220 | hypothetical protein                                                                                  | 4315087-4315785 |
| 271 | C4Q28_20225 | aminotransferase                                                                                      | 4315785-4316897 |
| 272 | C4Q28_20230 | Vi polysaccharide<br>biosynthesis UDP-<br>N-<br>acetylglucosaminur<br>onic acid C-4<br>epimerase TviC | 4317109-4318134 |
| 273 | C4Q28_20235 | Vi polysaccharide<br>biosynthesis UDP-<br>N-<br>acetylglucosamine<br>C-6 dehydrogenase<br>TviB        | 4318196-4319473 |

|    |                     |     |             |                                                 |                 |
|----|---------------------|-----|-------------|-------------------------------------------------|-----------------|
|    |                     | 274 | C4Q28_20240 | chain-length<br>determining protein             | 4319774-4321078 |
|    |                     | 275 | C4Q28_20245 | hypothetical protein                            | 4321297-4322346 |
| 13 | 5039533-<br>5058869 | 276 | C4Q28_23550 | hypothetical protein                            | 5039637-5040428 |
|    |                     | 277 | C4Q28_23555 | integrase                                       | 5040613-5040942 |
|    |                     | 278 | C4Q28_23560 | restriction<br>endonuclease<br>subunit R        | 5041083-5043470 |
|    |                     | 279 | C4Q28_23565 | hypothetical protein                            | 5043478-5043660 |
|    |                     | 280 | C4Q28_23570 | restriction<br>endonuclease<br>subunit S        | 5043674-5044786 |
|    |                     | 281 | C4Q28_23575 | type I restriction<br>endonuclease<br>subunit M | 5044783-5046237 |
|    |                     | 282 | C4Q28_23580 | hypothetical protein                            | 5047770-5048012 |
|    |                     | 283 | C4Q28_23585 | hypothetical protein                            | 5048121-5048384 |
|    |                     | 284 | C4Q28_23590 | hypothetical protein                            | 5049016-5049225 |
|    |                     | 285 | C4Q28_23595 | DUF726 domain-<br>containing protein            | 5049217-5052462 |
|    |                     | 286 | C4Q28_23600 | labile enterotoxin<br>output A                  | 5052462-5054165 |

|     |             |                                   |                 |
|-----|-------------|-----------------------------------|-----------------|
| 287 | C4Q28_23605 | hypothetical protein              | 5054502-5054759 |
| 288 | C4Q28_23610 | WYL domain-<br>containing protein | 5054879-5055754 |
| 289 | C4Q28_23615 | hypothetical protein              | 5055914-5056120 |
| 290 | C4Q28_23620 | hypothetical protein              | 5056147-5056347 |
| 291 | C4Q28_23625 | hypothetical protein              | 5056682-5058163 |
| 292 | C4Q28_23630 | GABA permease                     | 5058478-5059869 |

---

Table S10. Predicted ORF functions of putative prophage.

| CDS | coordinates   | AA<br>Size | <sup>a</sup> Locus<br>Tag | Function                          |
|-----|---------------|------------|---------------------------|-----------------------------------|
| 1   | 666612-667673 | 353        | 11631                     | Site specific recombinase XerD    |
| 2   | 667800-667844 | -          | -                         | <i>attL</i>                       |
| 3   | 668199-669800 | 533        | 11632                     | hypothetical protein              |
| 4   | 669838-670809 | 323        | 11633                     | hypothetical protein              |
| 5   | 670782-671486 | 234        | 11634                     | hypothetical protein              |
| 6   | 671483-672031 | 182        | 11635                     | DNA-binding protein               |
| 7   | 672028-672951 | 307        | 11636                     | hypothetical protein              |
| 8   | 672948-673655 | 235        | 11637                     | hypothetical protein              |
| 9   | 673663-674709 | 348        | 11638                     | hypothetical protein              |
| 10  | 674893-676059 | 388        | 11638                     | phage tail protein                |
| 11  | 676068-676592 | 174        | 11639                     | phage tail protein                |
| 12  | 676589-677761 | 390        | 11640                     | Phage protein gp47                |
| 13  | 677758-678075 | 105        | 11641                     | DUF2590 domain-containing protein |
| 14  | 678075-680438 | 787        | 11642                     | phage tail tape measure protein   |
| 15  | 680613-680900 | 95         | 11643                     | tail assembly chaperone           |
| 16  | 680897-681394 | 165        | 11644                     | lysis protein                     |
| 17  | 681391-681921 | 176        | 11645                     | lysozyme                          |
| 18  | 681918-682124 | 68         | 11646                     | hypothetical protein              |
| 19  | 682121-682339 | 72         | 11647                     | conjugal transfer protein TraR    |
| 20  | 682339-682788 | 149        | 11648                     | DUF2597 domain-containing protein |

|    |               |      |       |                                                       |
|----|---------------|------|-------|-------------------------------------------------------|
| 21 | 682795-683910 | 371  | 11649 | DUF2586 domain-containing protein                     |
| 22 | 683922-684602 | 226  | 11650 | virion morphogenesis protein                          |
| 23 | 684592-685047 | 151  | 11651 | phage tail completion protein                         |
| 24 | 685044-685505 | 153  | 11652 | head completion protein                               |
| 25 | 685604-686329 | 241  | 11653 | terminase                                             |
| 26 | 686326-687345 | 339  | 11654 | phage major capsid protein, P2 family                 |
| 27 | 687345-688307 | 320  | 11655 | capsid scaffolding protein                            |
| 28 | 688468-690456 | 680  | 11656 | terminase                                             |
| 29 | 690350-691282 | 245  | 11657 | phage portal protein                                  |
| 30 | 692061-692294 | 77   | 11658 | hypothetical protein                                  |
| 31 | 692291-692548 | 85   | 11659 | DNA-binding protein                                   |
| 32 | 692559-692798 | 79   | 11660 | hypothetical protein                                  |
| 33 | 692865-693104 | 79   | 11661 | hypothetical protein                                  |
| 34 | 693564-696257 | 897  | 11662 | Toprim domain-containing protein                      |
| 35 | 696577-696813 | 78   | 11664 | XRE family transcriptional regulator                  |
| 36 | 696817-697887 | 356  | 11665 | Site specific recombinase XerD                        |
| 37 | 697952-698025 | 74   | 11666 | tRNA-Met                                              |
| 38 | 697949-697993 | -    | -     | <i>attR</i>                                           |
| 39 | 698042-701785 | 1247 | 11667 | bifunctional diguanylate<br>cyclase/phosphodiesterase |
| 40 | 701905-703755 | 616  | 11668 | RNA polymerase sigma factor                           |
| 41 | 703823-705805 | 660  | 11669 | DNA primase                                           |

---

<sup>a</sup> JGI locus tags numbers begin with Ga0255654\_

Table S11. Predicted genes that encode for antibiotic resistance.

| Resistance to   | Number of genes in: |       |      |      |      |
|-----------------|---------------------|-------|------|------|------|
|                 | SWI36               | SWI44 | SWI6 | SWI7 | PAO1 |
| Lactams         | 9                   | 10    | 10   | 7    | 5    |
| Chloramphenicol | 6                   | 4     | 4    | 3    | 1    |
| Macrolides      | 2                   | 2     | 2    | 3    | 1    |
| Vancomycin      | 0                   | 0     | 0    | 0    | 1    |
| Aminoglycosides | 2                   | 1     | 1    | 1    | 2    |
| Efflux pumps    | 15                  | 11    | 11   | 12   | 12   |
| Total           | 34                  | 28    | 28   | 26   | 22   |
